# Supplementary material for: Accurate measurement of sequential Ar desorption energies from the dispersion-dominated Ar1–3 complexes of aromatic molecules
Source: Royal Society of Chemistry journal article supplement (doi:10.1039/d2cp04676h), 2022-12-20
Supplement: d2cp04676h1.pdf [file d2cp04676h1.pdf]

Electronic Supplementary Information for

Accurate measurement of sequential Ar desorption energies from the dispersion-dominated  
 $\text{Ar}_{1-3}$  complexes of aromatic molecule

Saurabh Khodia<sup>a</sup>, Ramesh Jarupula<sup>a</sup> and Surajit Maity<sup>\*a</sup>

Department of Chemistry, Indian Institute of Technology Hyderabad, Kandi, Sangareddy,  
India, 502285

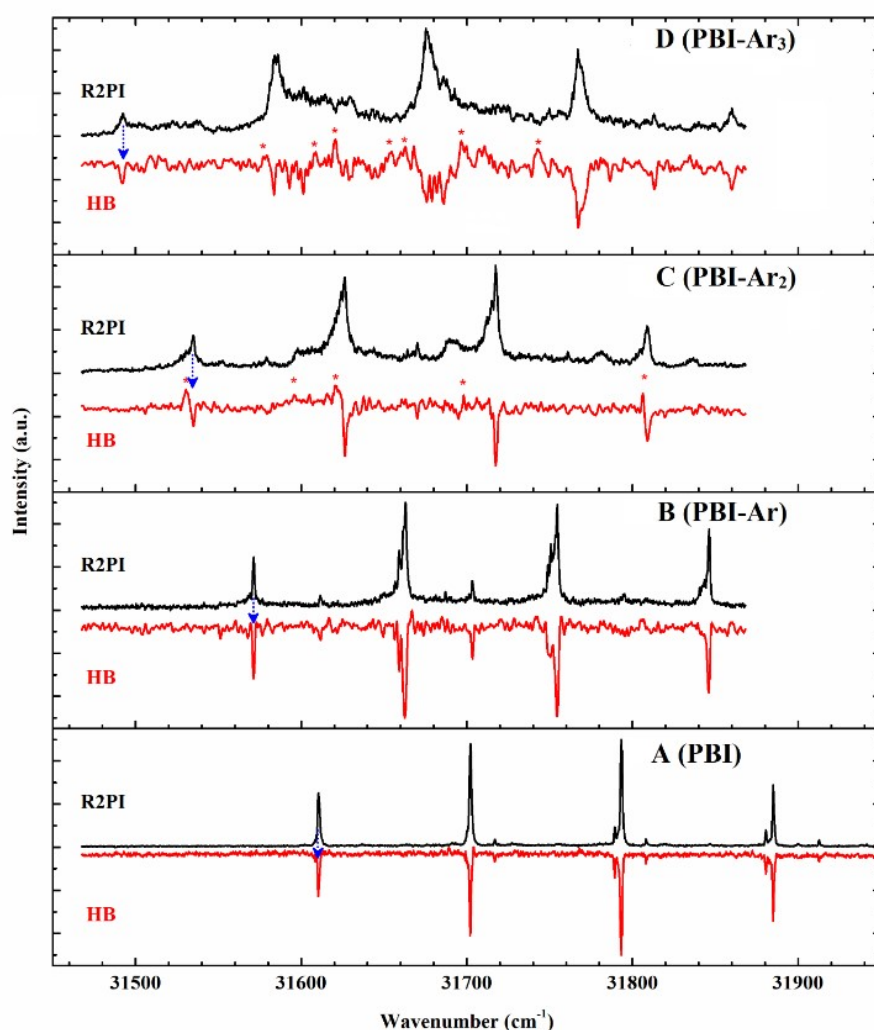

**SI Figure S1.** The difference spectra (HB) of PBI-Ar<sub>n</sub> complexes were recorded by subtracting the R2PI spectra recorded with and without the hole-burning laser. The dotted arrows indicate the wavenumbers of the hole-burning laser positions. The \* indicates contributions from low-energy isomers in the PBI-Ar<sub>2/3</sub> systems.

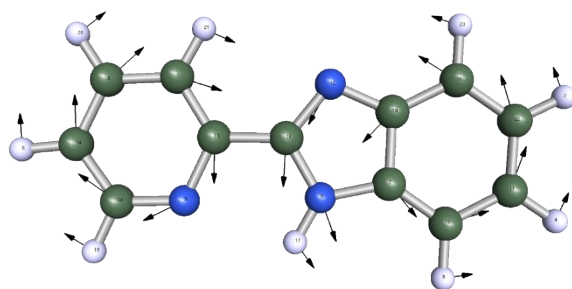

**SI Figure S2.** The  $\nu_{45}$  vibrational modes corresponding to symmetric in-plane bending with respect to the C–C linkage between the pyridyl and imidazolyl groups.

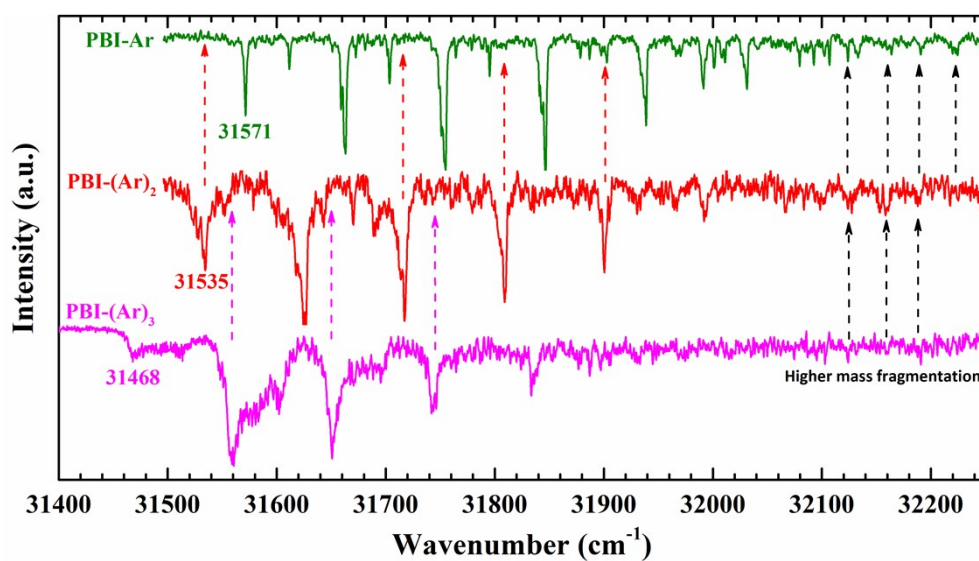

**SI Figure S3.** Comparison of R2PI spectrum of PBI-Ar, PBI-Ar<sub>2</sub> and PBI-Ar<sub>3</sub> highlighting the fragmentation of higher masses

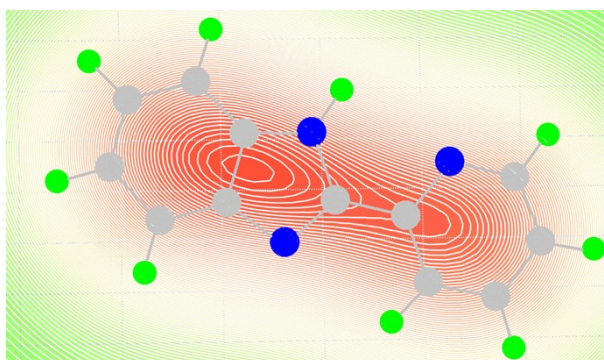

**SI Figure S4.** The dispersion contours of the Ar atom above the PBI molecular plane were calculated using the B3LYP-D3(BJ) method. The dispersion energies were calculated by placing the Ar atom on a plane parallel to the  $\sigma$  plane of the PBI molecule separated by 3.4 Å.
